# Supplementary figures and images for: Initial contact guidance during cell spreading is contractility-independent
Source: Royal Society of Chemistry journal article supplement (doi:10.1039/c6sm02685k), 2017-01-01

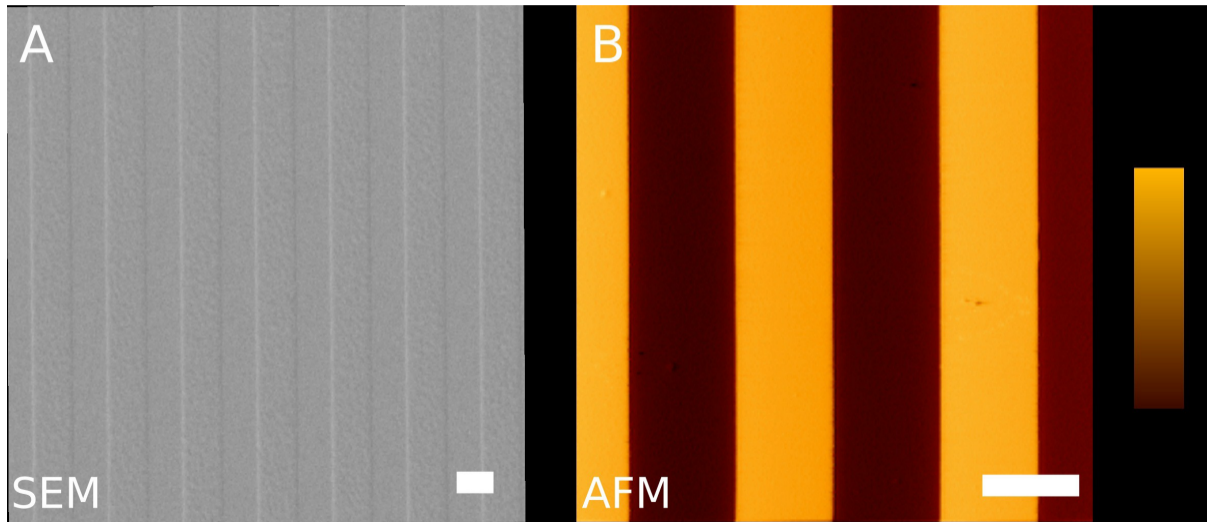

Supplement: c6sm02685k2.pdf [file c6sm02685k2.pdf]
